# Supplementary material
Source: Springer Nature journal article supplement (https://www.springermedizin.de/resource/supplementary/12985_2010_925_MOESM3_ESM.pdf/9608752)

# Riboprobe specific to:

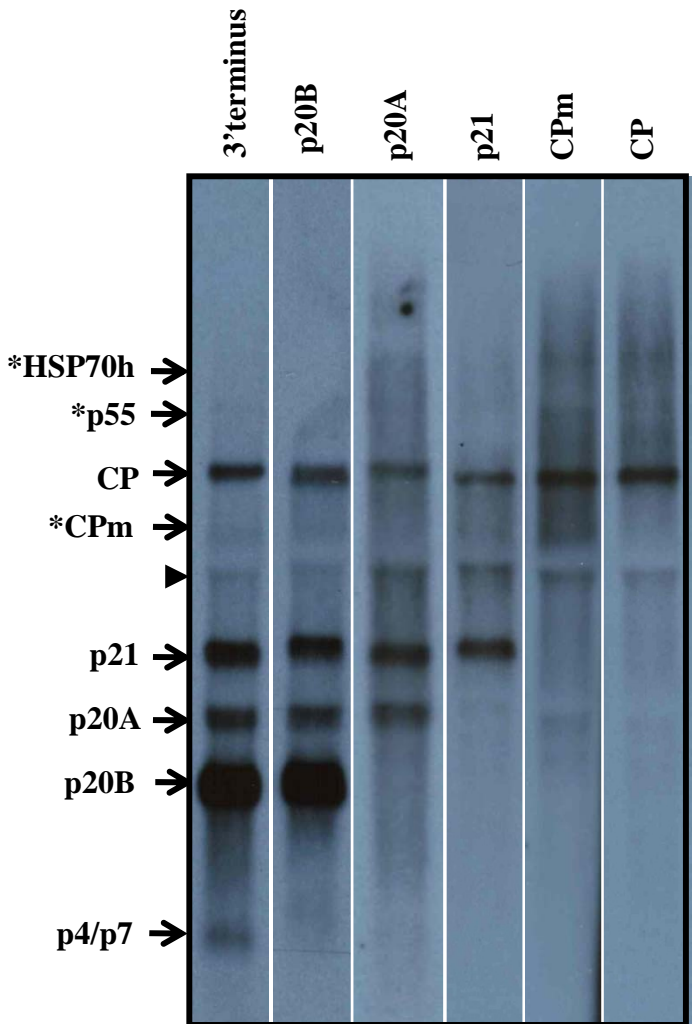

Supplement: MOESM3 [file 9608752]
